# Supplementary material for: The Pathobiology of H7N3 Low and High Pathogenicity Avian Influenza Viruses from the United States Outbreak in 2020 Differs between Turkeys and Chickens
Source: MDPI journal article supplement (doi:10.3390/v13091851), 2021-09-16
Supplement: s1 [file s1]

**Supplementary Table S1.** Statistical comparisons between area under the curves (AUCs) of virus shedding from turkeys and chickens inoculated with H7N3 viruses as measured by qRT-PCR. ns= not significant.

| Species | Swabs | Virus 1 | Dose 1 | Virus 2 | Dose 2 | 95% confidence interval of the difference | Summary | Adjusted <i>p</i> Value |
|---------|-------|---------|--------|---------|--------|-------------------------------------------|---------|-------------------------|
| Turkey  | OP    | LPAIV-1 | 5      | HPAIV   | 6      | 25.09 to 54.77                            | ****    | <0.0001                 |
|         |       | LPAIV-2 | 5      | HPAIV   | 6      | 21.35 to 51.03                            | ****    | <0.0001                 |
|         |       | LPAIV-1 | 5      | LPAIV-2 | 5      | -11.10 to 18.58                           | ns      | 0.9845                  |
|         | CL    | LPAIV-1 | 5      | HPAIV   | 6      | 4.898 to 34.57                            | **      | 0.0033                  |
|         |       | LPAIV-2 | 5      | HPAIV   | 6      | 16.33 to 46.00                            | ****    | <0.0001                 |
|         |       | LPAIV-1 | 5      | LPAIV-2 | 5      | -26.27 to 3.405                           | ns      | 0.2237                  |
| Chicken | OP    | LPAIV-1 | 6      | HPAIV   | 6      | -38.93 to -15.58                          | ****    | <0.0001                 |
|         |       | LPAIV-2 | 6      | HPAIV   | 6      | -25.17 to -1.815                          | *       | 0.0126                  |
|         |       | LPAIV-1 | 6      | LPAIV-2 | 6      | 2.083 to 25.44                            | *       | 0.0101                  |
|         | CL    | LPAIV-1 | 6      | HPAIV   | 6      | -31.50 to -8.150                          | ****    | <0.0001                 |
|         |       | LPAIV-2 | 6      | HPAIV   | 6      | -21.68 to 1.670                           | ns      | 0.1500                  |
|         |       | LPAIV-1 | 6      | LPAIV-2 | 6      | -1.857 to 21.50                           | ns      | 0.1676                  |
